# Supplementary material for: Homocysteine-Lowering by B Vitamins Slows the Rate of Accelerated Brain Atrophy in Mild Cognitive Impairment: A Randomized Controlled Trial
Source: PubMed Central journal article supplement (PMC2935890; doi:10.1371/journal.pone.0012244), 2010-09-08
Supplement: pone.0012244.s002.pdf [file pone.0012244.s002.pdf]

**Supplementary Table S1. Pearson correlations with the rate of atrophy (% per year) in the placebo group (N=83)**

|                                      | <b>Unadjusted<br/>Correlation</b> | <b><i>P</i></b>  | <b>Age-adjusted<br/>correlation</b> | <b><i>P</i></b>  |
|--------------------------------------|-----------------------------------|------------------|-------------------------------------|------------------|
| Age at first visit                   | <b>0.317</b>                      | <b>0.004</b>     |                                     |                  |
| Initial brain volume                 | <b>-0.319</b>                     | <b>0.003</b>     | -0.187                              | 0.092            |
| Total schooling                      | 0.011                             | 0.923            | 0.030                               | 0.787            |
| Body mass index at baseline          | 0.056                             | 0.615            | 0.064                               | 0.565            |
| Diastolic blood pressure at baseline | <b>-0.310</b>                     | <b>0.004</b>     | <b>-0.213</b>                       | <b>0.054</b>     |
| Systolic blood pressure at baseline  | -0.101                            | 0.362            | -0.084                              | 0.455            |
| Creatinine at baseline               | <b>0.274</b>                      | <b>0.012</b>     | <b>0.218</b>                        | <b>0.049</b>     |
| Depression score (GDS) at baseline   | 0.156                             | 0.158            | 0.148                               | 0.184            |
| Cystathionine at baseline            | 0.101                             | 0.363            | 0.102                               | 0.362            |
| Log folate at baseline               | -0.062                            | 0.58             | -0.092                              | 0.411            |
| Log vitamin B <sub>12</sub> baseline | -0.052                            | 0.644            | -0.002                              | 0.988            |
| Log holoTC at baseline               | -0.183                            | 0.098            | -0.125                              | 0.264            |
| Log TC saturation at baseline        | -0.268                            | <b>0.014</b>     | -0.180                              | 0.105            |
| Log tHcy at baseline                 | <b>0.492</b>                      | <b>&lt;0.001</b> | <b>0.407</b>                        | <b>&lt;0.001</b> |

Abbreviations: GDS, Geriatric Depression Scale; HoloTC, holotranscobalamin; TC saturation, ratio of holoTC to total TC; tHcy, total homocysteine. Analytes whose values were not normally distributed in the population were log transformed prior to analysis.
