# Supplementary material for: Homocysteine-Lowering by B Vitamins Slows the Rate of Accelerated Brain Atrophy in Mild Cognitive Impairment: A Randomized Controlled Trial
Source: PubMed Central journal article supplement (PMC2935890; doi:10.1371/journal.pone.0012244), 2010-09-08
Supplement: pone.0012244.s003.pdf [file pone.0012244.s003.pdf]

**Supplementary Table S2.**

**Subgroup analyses: effects of several factors on the rate of atrophy and on the treatment effect**

| Factor                                  | Placebo |                           |             | Active treatment <sup>a</sup> |                           |             | P value <sup>b</sup> |              |              |
|-----------------------------------------|---------|---------------------------|-------------|-------------------------------|---------------------------|-------------|----------------------|--------------|--------------|
|                                         | N       | Atrophy rate (95% CI) %/y |             | N                             | Atrophy rate (95% CI) %/y |             | Treatment            | Factor       | Interaction  |
| Age≤75.00 years                         | 36      | 0.95                      | (0.74-1.17) | 39                            | 0.64                      | (0.43-0.84) | <b>0.004</b>         | <b>0.023</b> | 0.824        |
| Age>75.00 years                         | 47      | 1.16                      | (0.98-1.35) | 46                            | 0.89                      | (0.70-1.08) |                      |              |              |
| Male                                    | 31      | 1.04                      | (0.81-1.26) | 35                            | 0.85                      | (0.64-1.07) | <b>0.004</b>         | 0.707        | 0.267        |
| Female                                  | 52      | 1.11                      | (0.94-1.29) | 50                            | 0.70                      | (0.52-0.88) |                      |              |              |
| Amnesic MCI                             | 51      | 1.15                      | (0.97-1.33) | 46                            | 0.87                      | (0.67-1.06) | <b>0.004</b>         | 0.107        | 0.741        |
| Non-amnesic MCI                         | 26      | 1.00                      | (0.75-1.26) | 31                            | 0.65                      | (0.42-0.88) |                      |              |              |
| Never smoker                            | 40      | 1.02                      | (0.82-1.23) | 47                            | 0.75                      | (0.56-0.93) | <b>0.002</b>         | 0.453        | 0.708        |
| Ever smoker                             | 43      | 1.14                      | (0.94-1.33) | 38                            | 0.78                      | (0.58-0.99) |                      |              |              |
| No aspirin, baseline                    | 55      | 1.11                      | (0.94-1.27) | 59                            | 0.66                      | (0.50-0.82) | <b>0.021</b>         | 0.190        | <b>0.052</b> |
| Aspirin at baseline                     | 28      | 1.04                      | (0.80-1.27) | 26                            | 1.00                      | (0.76-1.24) |                      |              |              |
| No NSAID at baseline                    | 71      | 1.08                      | (0.93-1.23) | 67                            | 0.77                      | (0.61-0.92) | <b>0.015</b>         | 0.960        | 0.958        |
| NSAID at baseline                       | 12      | 1.08                      | (0.72-1.50) | 18                            | 0.75                      | (0.45-1.05) |                      |              |              |
| No CVD drug, baseline                   | 47      | 0.97                      | (0.79-1.16) | 43                            | 0.76                      | (0.57-0.96) | <b>0.001</b>         | 0.234        | 0.213        |
| CVD drug at baseline                    | 36      | 1.22                      | (1.01-1.43) | 42                            | 0.76                      | (0.57-0.96) |                      |              |              |
| No antihypertensive                     | 56      | 1.08                      | (0.91-1.25) | 51                            | 0.74                      | (0.56-0.92) | <b>0.003</b>         | 0.709        | 0.849        |
| Antihypertensive at baseline            | 27      | 1.10                      | (0.85-1.34) | 34                            | 0.80                      | (0.58-1.02) |                      |              |              |
| No TIA/stroke at baseline               | 75      | 1.01                      | (0.86-1.15) | 75                            | 0.77                      | (0.63-0.91) | <b>&lt;0.001</b>     | <b>0.028</b> | <b>0.014</b> |
| TIA/stroke at baseline                  | 8       | 1.76                      | (1.31-2.21) | 10                            | 0.74                      | (0.35-1.14) |                      |              |              |
| No stroke, TIA, MRI infarct at baseline | 68      | 0.99                      | (0.84-1.14) | 72                            | 0.75                      | (0.61-0.90) | <b>0.001</b>         | <b>0.025</b> | 0.098        |
| Stroke, TIA or MRI infarct at baseline  | 15      | 1.51                      | (1.18-1.83) | 13                            | 0.84                      | (0.49-1.18) |                      |              |              |

| Supplementary Table S2 contd. 2  |         |                           |             |  |                               |                           |             |                      |              |              |
|----------------------------------|---------|---------------------------|-------------|--|-------------------------------|---------------------------|-------------|----------------------|--------------|--------------|
| Factor                           | Placebo |                           |             |  | Active treatment <sup>a</sup> |                           |             | P value <sup>b</sup> |              |              |
|                                  | N       | Atrophy rate (95% CI) %/y |             |  | N                             | Atrophy rate (95% CI) %/y |             | Treatment            | Factor       | Interaction  |
| CNS drugs at baseline            | 63      | 1.03                      | (0.87-1.18) |  | 62                            | 0.74                      | (0.58-0.90) | <b>0.002</b>         | 0.17         | 0.274        |
| No drugs at baseline             | 20      | 1.26                      | (0.98-1.54) |  | 23                            | 0.82                      | (0.54-1.08) |                      |              |              |
| No diabetes                      | 73      | 1.05                      | (0.90-1.19) |  | 81                            | 0.73                      | (0.59-0.87) | 0.508                | <b>0.014</b> | 0.334        |
| Diabetes anytime                 | 10      | 1.34                      | (0.94-1.73) |  | 4                             | 1.40                      | (0.77-2.02) |                      |              |              |
| B vitamins, baseline             | 17      | 0.86                      | (0.56-1.17) |  | 14                            | 0.99                      | (0.65-1.32) | 0.246                | 0.962        | <b>0.034</b> |
| No B vitamins                    | 66      | 1.14                      | (0.99-1.29) |  | 71                            | 0.72                      | (0.57-0.87) |                      |              |              |
| Initial brain < median           | 43      | 1.16                      | (0.97-1.36) |  | 39                            | 0.84                      | (0.63-1.04) | <b>0.002</b>         | 0.157        | 0.844        |
| Initial brain ≥ median           | 40      | 0.99                      | (0.79-1.20) |  | 46                            | 0.70                      | (0.52-0.89) |                      |              |              |
| Without APOE4                    | 54      | 1.07                      | (0.89-1.24) |  | 63                            | 0.74                      | (0.58-0.90) | <b>0.005</b>         | 0.523        | 0.842        |
| With APOE4                       | 29      | 1.11                      | (0.88-1.35) |  | 22                            | 0.83                      | (0.56-1.10) |                      |              |              |
| MTHFR 677CC                      | 33      | 1.03                      | (0.81-1.08) |  | 35                            | 0.82                      | (0.61-1.04) | <b>0.004</b>         | 0.947        | 0.577        |
| MTHFR 677CT                      | 42      | 1.10                      | (0.90-1.05) |  | 41                            | 0.72                      | (0.52-0.92) |                      |              |              |
| MTHFR 677TT                      | 8       | 1.23                      | (0.78-1.27) |  | 9                             | 0.70                      | (0.27-1.12) |                      |              |              |
| TCN2 776CC                       | 21      | 1.08                      | (0.80-1.36) |  | 31                            | 0.86                      | (0.63-1.08) | <b>0.001</b>         | 0.733        | 0.263        |
| TCN2 776CG                       | 14      | 1.02                      | (0.83-1.21) |  | 45                            | 0.75                      | (0.56-0.94) |                      |              |              |
| TCN2 776GG                       | 18      | 1.23                      | (0.93-1.53) |  | 9                             | 0.51                      | (0.08-0.93) |                      |              |              |
| Creatinine ≤ median <sup>c</sup> | 39      | 1.01                      | (0.81-1.21) |  | 42                            | 0.63                      | (0.43-0.82) | <b>0.002</b>         | <b>0.036</b> | 0.489        |
| Creatinine > median              | 44      | 1.15                      | (0.96-1.34) |  | 42                            | 0.91                      | (0.71-1.10) |                      |              |              |
| tHcy ≤ median                    | 44      | 0.89                      | (0.70-1.08) |  | 40                            | 0.79                      | (0.59-0.98) | <b>0.001</b>         | 0.068        | <b>0.019</b> |
| tHcy > median                    | 39      | 1.30                      | (1.10-1.50) |  | 45                            | 0.74                      | (0.56-0.93) |                      |              |              |
| tHcy 1st quartile                | 20      | 0.84                      | (0.57-1.12) |  | 21                            | 0.86                      | (0.59-1.12) | <b>0.001</b>         | 0.139        | <b>0.023</b> |
| 2 <sup>nd</sup> quartile         | 23      | 0.92                      | (0.66-1.18) |  | 19                            | 0.71                      | (0.43-0.99) |                      |              |              |
| 3 <sup>rd</sup> quartile         | 18      | 1.05                      | (0.76-1.34) |  | 24                            | 0.78                      | (0.53-1.03) |                      |              |              |
| 4 <sup>th</sup> quartile         | 21      | 1.52                      | (1.25-1.79) |  | 21                            | 0.71                      | (0.44-0.98) |                      |              |              |

| Supplementary Table S2. contd. 3 |         |                           |             |  |                               |                           |             |                      |        |             |
|----------------------------------|---------|---------------------------|-------------|--|-------------------------------|---------------------------|-------------|----------------------|--------|-------------|
| Factor                           | Placebo |                           |             |  | Active treatment <sup>a</sup> |                           |             | P value <sup>b</sup> |        |             |
|                                  | N       | Atrophy rate (95% CI) %/y |             |  | N                             | Atrophy rate (95% CI) %/y |             | Treatment            | Factor | Interaction |
| Folate < median                  | 39      | 1.07                      | (0.87-1.28) |  | 45                            | 0.70                      | (0.51-0.89) | <b>0.002</b>         | 0.465  | 0.595       |
| Folate ≥ median                  | 44      | 1.09                      | (0.90-1.28) |  | 40                            | 0.83                      | (0.63-1.03) |                      |        |             |
| Vitamin B <sub>12</sub> < median | 37      | 1.07                      | (0.86-1.28) |  | 47                            | 0.77                      | (0.58-0.96) | <b>0.002</b>         | 0.976  | 0.832       |
| Vitamin B <sub>12</sub> ≥ median | 46      | 1.09                      | (0.91-1.28) |  | 38                            | 0.75                      | (0.55-0.96) |                      |        |             |
| HoloTC < median                  | 37      | 1.20                      | (0.99-1.41) |  | 47                            | 0.76                      | (0.58-0.95) | <b>0.001</b>         | 0.304  | 0.280       |
| HoloTC ≥ median                  | 46      | 0.99                      | (0.80-1.18) |  | 38                            | 0.77                      | (0.56-0.97) |                      |        |             |
| TC saturation < median           | 35      | 1.22                      | (1.01-1.44) |  | 45                            | 0.76                      | (0.57-0.95) | <b>0.001</b>         | 0.261  | 0.188       |
| TC saturation ≥ median           | 48      | 0.98                      | (0.79-1.16) |  | 40                            | 0.77                      | (0.57-0.97) |                      |        |             |

Abbreviations: *APOE*, gene for apolipoprotein E; CVD, cardiovascular disease; HoloTC, holotranscobalamin; *MTHFR*, gene for methylenetetrahydrofolate reductase; NSAID, non-steroidal anti-inflammatory drug; *TCN2*, gene for transcobalamin-2; tHcy, plasma total homocysteine; TIA, transient ischemic attack

<sup>a</sup>Active treatment group received daily supplements of folic acid (0.8 mg), vitamin B<sub>12</sub> (0.5 mg) and vitamin B<sub>6</sub> (20 mg) for 24 months. <sup>b</sup>ANOVA was used to examine the effect of each factor on atrophy rate and its possible interaction with the treatment category (two right-hand columns); all analyses were adjusted for age at baseline. <sup>c</sup>Ranked according to sex.
