# Supplementary material for: Homocysteine-Lowering by B Vitamins Slows the Rate of Accelerated Brain Atrophy in Mild Cognitive Impairment: A Randomized Controlled Trial
Source: PubMed Central journal article supplement (PMC2935890; doi:10.1371/journal.pone.0012244), 2010-09-08
Supplement: pone.0012244.s004.pdf [file pone.0012244.s004.pdf]

### Supplementary Table S3. Withdrawals and adverse events

|                                  | Placebo<br>(n=133) |         | Active treatment <sup>a</sup><br>(n=133) |         | P value <sup>b</sup> |
|----------------------------------|--------------------|---------|------------------------------------------|---------|----------------------|
|                                  | Mean or n          | SD or % | Mean or n                                | SD or % |                      |
| Total withdrawals <sup>c</sup>   | 20                 | 15.0    | 23                                       | 17.3    |                      |
| Time to withdrawal (d)           | 441                | 179     | 298                                      | 197     | <b>0.017</b>         |
| Self-withdrawal                  | 9                  | 6.8     | 11                                       | 8.3     |                      |
| Time to withdrawal (d)           | 469                | 115     | 231                                      | 144     | <b>&lt;0.001</b>     |
| Cancer withdrawal                | 8                  | 6.0     | 5                                        | 3.8     |                      |
| Time to withdrawal (d)           | 370                | 229     | 394                                      | 186     |                      |
| Exclusion criterion withdrawal   | 1                  |         | 1                                        |         |                      |
| Time to withdrawal (d)           | 390                |         | 433                                      |         |                      |
| Other                            | 2                  |         | 4                                        |         |                      |
| Time to withdrawal (d)           | 620                | 145     | 231                                      | 231     |                      |
| Change in depression score (GDS) | 0.018              | 3.6     | -0.073                                   | 3.4     |                      |
| Loss of vibration sense          | 13                 | 9.8     | 3                                        | 2.2     | <b>0.019</b>         |
| Myocardial infarction            | 1                  |         | 1                                        |         |                      |
| Stroke                           | 1                  |         | 3 <sup>d</sup>                           |         |                      |
| Death                            | 0                  |         | 2 <sup>e</sup>                           |         |                      |
| Time to death (d)                |                    |         | 490                                      |         |                      |
| Total adverse events             | 271                |         | 242                                      |         |                      |

Abbreviation: GDS, Geriatric Depression Scale

<sup>a</sup>Active treatment group received daily supplements of folic acid (0.8 mg), vitamin B<sub>12</sub> (0.5 mg) and vitamin B<sub>6</sub> (20 mg) for 24 months. <sup>b</sup>Only P values < 0.1 are shown. <sup>c</sup>Excluding 5 who withdrew before starting the tablets and 2 who withdrew after the 24 month visit (i.e., after stopping intervention). <sup>d</sup>Includes one of the 2 participants who died. <sup>e</sup>One hemorrhagic stroke; one pulmonary embolism.
